# Supplementary material for: A Meta-Analysis to Understand the Relationship between Pig Body Weight and Variation from Birth to Market
Source: MDPI journal article supplement (doi:10.3390/ani11072088), 2021-07-14
Supplement: s1 [file s1]

**Supplementary data. Table S1.** Pig genotype and type of system for trials used in the meta-analysis.

| Publication    | Trial | Genotype                                                            | Type of system                                       | Reference |
|----------------|-------|---------------------------------------------------------------------|------------------------------------------------------|-----------|
| Peterson, 2004 | 1     | Mating line A sires, line B sires and line C sires to PIC C-22 dams | Wean-to-finish                                       | [14]      |
| Peterson, 2004 | 2     | Mating line A sires, line B sires and line C sires to PIC C-22 dams | Wean-to-finish                                       | [14]      |
| Main, 2004     | 1     | PIC Line 280 × C22                                                  | Multisite production system                          | [15]      |
| Main, 2004     | 2     | PIC Line 280 × C22                                                  | Multisite production system                          | [15]      |
| Fix, 2010      | 1     | Large White × Landrace sows bred to Duroc boars                     | Multisite production system                          | [16]      |
| Fix, 2010      | 2     | Large White × Landrace sows bred to Duroc boars                     | Multisite production system                          | [16]      |
| Beaulieu, 2010 | 1     | Camborough Plus, C-22, or F2 sows; by PIC 337 sire                  | Multisite production system                          | [17]      |
| Shull, 2013    | 1     | PIC 359 sires mated to PIC C22 or PIC C29 dams                      | Wean-to-finish                                       | [18]      |
| Shull, 2013    | 2     | PIC 359 sires mated to either PIC C22 or PIC C29 dams               | Wean-to-finish                                       | [18]      |
| Shull, 2013    | 3     | PIC 359 sires mated to PIC C29 dams                                 | Farrowing house and then Wean-to-finish              | [18]      |
| Flohr, 2015    | 1     | PIC 359 × Genetiporc F25                                            | Wean-to-finish                                       | [19]      |
| Zotti, 2017    | 1     | Topigs Tybor × Topigs 20                                            | Farrowing house and then multisite production system | [20]      |
| Hastad, 2019   | 1     | PIC L337 × 1050                                                     | No specified                                         | [21]      |
| Hastad, 2019   | 2     | PIC L337 × 1050                                                     | No specified                                         | [21]      |
| Faccin, 2020   | 1     | PIC 337 × Camborough                                                | Multisite production system                          | [22]      |
| Williams, 2020 | 1     | DNA 241 × 600                                                       | Multisite university research facility               | [23]      |
